# Supplementary material
Source: MDPI journal article supplement (https://www.mdpi.com/1999-4907/15/5/736)
Supplement: s1 [file s1]

## Supplementary Material

**Table S1.** Optimal parameters of machine learning algorithm under different factor combination Schemes.

| Method | Parameters                                                                                              | Scheme1 | Scheme2 | Scheme3 | Scheme4 |
|--------|---------------------------------------------------------------------------------------------------------|---------|---------|---------|---------|
| RF     | mtry<br>(number of predictors sampled for splitting at each node)                                       | 13      | 9       | 9       | 11      |
|        | ntrees<br>(number of trees grown)                                                                       | 500     | 500     | 500     | 500     |
|        | eta<br>(control the learning rate)                                                                      | 0.4     | 0.4     | 0.4     | 0.4     |
|        | max_depth<br>( maximum depth of a tree)                                                                 | 3       | 3       | 3       | 3       |
|        | colsample_bytree<br>(subsample ratio of columns when constructing each tree)                            | 0.8     | 0.8     | 0.8     | 0.8     |
| XGB    | min_child_weight<br>(minimum sum of instance weight needed in a child)                                  | 1       | 1       | 1       | 1       |
|        | subsample<br>(subsample ratio of the training instance)                                                 | 1       | 0.75    | 1       | 1       |
|        | n_rounds<br>(max number of boosting iterations)                                                         | 150     | 150     | 150     | 150     |
|        | sigma<br>(the scale parameter of the hypothesized laplace distribution estimated by maximum likelihood) | 0.128   | 0.061   | 0.059   | 0.042   |
|        | C<br>(constant of the regularization term in the Lagrange formulation)                                  | 1       | 1       | 1       | 1       |
| SVM    |                                                                                                         |         |         |         |         |
|        |                                                                                                         |         |         |         |         |
| KNN    | k<br>(number of neighbours considered)                                                                  | 20      | 20      | 20      | 20      |
|        |                                                                                                         |         |         |         |         |

**Table S2.** StepLm fitting equation.

| Scheme | Equation                                                                                                                                                                                   |
|--------|--------------------------------------------------------------------------------------------------------------------------------------------------------------------------------------------|
| 1      | $y = -1.063T - 0.507H - 0.419H_8 - 1.546H_{15d} + 4.857W_8$ $- 23.385W_{3d} + 45.289W_{15d} - 0.002S_{16} + 0.002S_{15d} + 290.37$                                                         |
| 2      | $y = -0.554T - 0.397H_8 + 0.597H_{3d} - 0.752H_{15d} + 2.649W_8$ $- 20.493W_{3d} - 36.678W_{15d} - 0.003S_{16} - 0.004S_{15d} - 43.819MH$ $+ 3673.065MDBH + 37.54MFSH - 234.716CD - 7.776$ |
| 3      | $y = -0.512T + -0.411H_8 + 0.583H_{3d} - 0.829H_{15d} + 3.113W_8$ $- 19.582W_{3d} - 23.956W_{15d} - 0.003S_{16} - 0.004S_{15d} - 2.993Alt$ $- 9.041Asp - 5.537SG - 171.903SP + 1262.184$   |

| Scheme | Equation                                                                                                                                                                                                         |
|--------|------------------------------------------------------------------------------------------------------------------------------------------------------------------------------------------------------------------|
| 4      | $y = -0.47T - 0.396H_8 - 0.774H_{15d} + 0.598H_{3d} + 2.821W_8$ $- 20.422W_{3d} - 36.985W_{15d} - 0.003S_{16} - 0.004S_{15d} - 76.485MH$ $+ 5860.138MDBH - 243.847CD + 50.718MFSH - 0.414Alt$ $+ 6.01Asp + 3.07$ |

Note: The full names of factors are shown in Table 3.

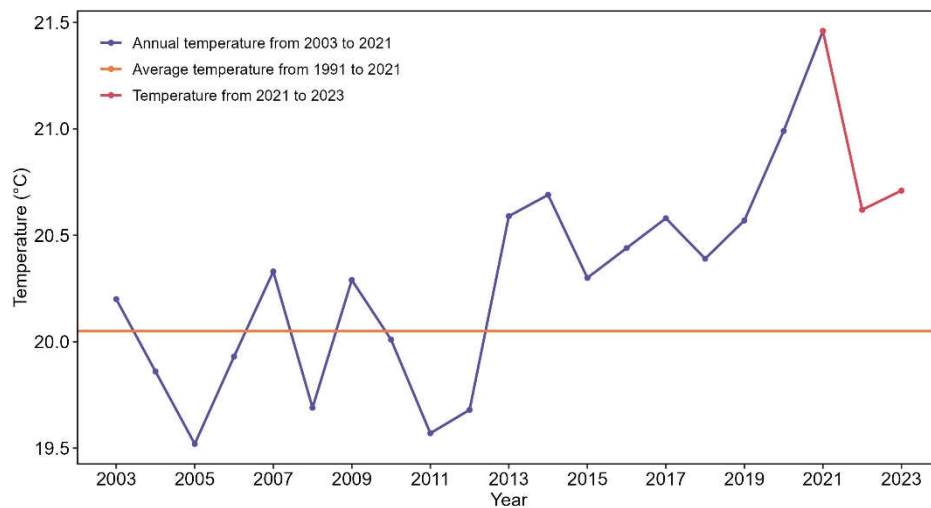

**Figure S1.** The change of average annual temperature in Gannan in recent 20 years.

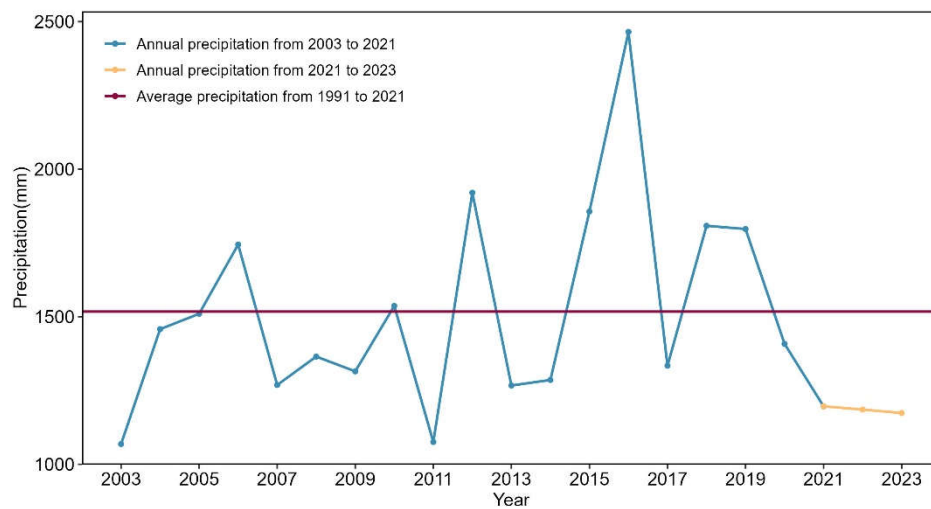

**Figure S2.** The change of average annual precipitation in Gannan in recent 20 years.

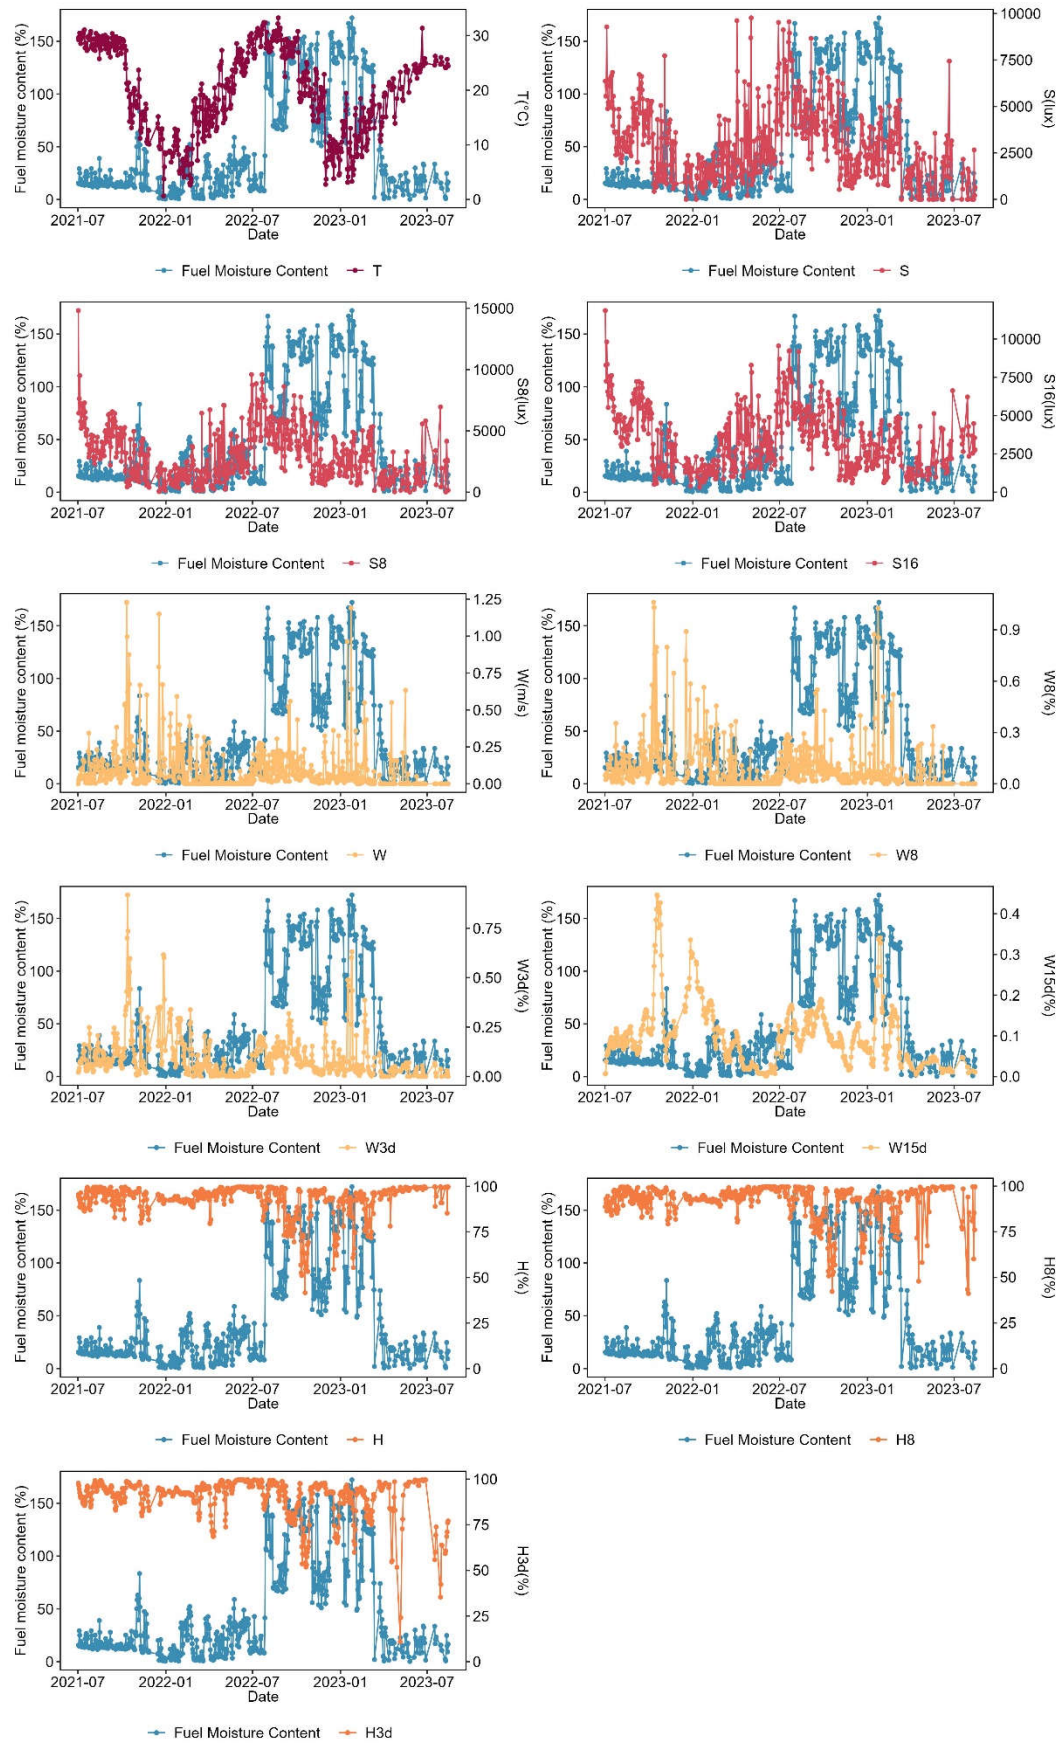

**Figure S3.** Time series of fuel moisture content and meteorological variables. The full names of the meteorological factors are shown in Table 3.
